# Supplementary material for: Geographical Distribution of Dietary Patterns and Their Association with T2DM in Chinese Adults Aged 45 y and Above: A Nationwide Cross-Sectional Study
Source: MDPI journal article supplement (doi:10.3390/nu16010107), 2023-12-28
Supplement: s1 [file s1]

**Table S1 Food grouping used in dietary pattern analysis**

| <b>Food Groups</b>      | <b>Food Groups</b>                                                      |
|-------------------------|-------------------------------------------------------------------------|
| Rice and Products       | rice and products                                                       |
| Wheat and Products      | wheat and products                                                      |
| Other Cereals           | corn and products, buckwheat, millet                                    |
| Fungi and Algae         | mushrooms, black fungus, white fungus, kelp, seaweed, nori              |
| Tubers                  | potatoes, taro, sweet potatoes                                          |
| Dry Legume              | mung beans, red beans, kidney beans                                     |
| Legume Products         | soybeans, soy milk, tofu pudding, Tofu, bean curd sheets, shredded tofu |
| Vegetables              | vegetables                                                              |
| Fruits                  | fruits                                                                  |
| Nuts                    | sunflower seeds, peanuts, walnuts, etc                                  |
| Pork                    | pork                                                                    |
| Other Red Meats         | beef, lamb, donkey meat, etc                                            |
| Meat Products and Offal | meat products, animal offal                                             |
| Poultry                 | poultry                                                                 |
| Aquatic Products        | fish, shrimp, crab, mollusks, etc                                       |
| Eggs                    | fresh eggs, salted eggs, century eggs                                   |
| Milk and Dairy Products | milk, milk powder, yogurt, cheese                                       |
| Liquors                 | Chinese spirits, beer, rice wine, grape wine                            |
| Beverages               | carbonated beverages, fruit and vegetable juice drinks, coffee, etc     |
| Snacks                  | snacks                                                                  |

**Table S2 Characteristics of subjects according to Dietary Pattern scores quartile distribution**

|                                              | Q1<br>N=9162    | Q2<br>N=9162    | Q3<br>N=9162    | Q4<br>N=9162    | P-value | P-trend |
|----------------------------------------------|-----------------|-----------------|-----------------|-----------------|---------|---------|
| <b>Oriental traditional Pattern</b>          |                 |                 |                 |                 |         |         |
| Female (n, %)                                | 5113(55·8)      | 5149(56·2)      | 4955(54·1)      | 4765(52·0)      | <0·001  | <0·001  |
| Age (Median,Q1, Q3,y)                        | 59·2(51·8;65·9) | 58·4(51·3;64·8) | 58·3(51·5;64·9) | 58·3(51·4;64·6) | <0·001  | <0·001  |
| Age group (n, %)                             |                 |                 |                 |                 | <0·001  | <0·001  |
| 45-59 y                                      | 4856(53·0)      | 5120(55·9)      | 5165(56·4)      | 5156(56·2)      |         |         |
| 60-74 y                                      | 3714(40·5)      | 3620(39·5)      | 3624(39·6)      | 3644(39·8)      |         |         |
| ≥75 y                                        | 592(6·5)        | 422(4·6)        | 373(4·0)        | 362(4·0)        |         |         |
| Rural (n, %)                                 | 6636(72·4)      | 5839(63·7)      | 5117(55·9)      | 4396(48·0)      | <0·001  | <0·001  |
| Income (n, %)                                |                 |                 |                 |                 | <0·001  | <0·001  |
| <5000 Yuan/month                             | 7792(85·1)      | 7396(80·7)      | 7142(78·0)      | 6651(72·6)      |         |         |
| 5000-9999 Yuan/month                         | 1037(11·3)      | 1376(15·0)      | 1553(17·0)      | 1973(21·5)      |         |         |
| ≥10000 Yuan/month                            | 333(3·6)        | 390(4·3)        | 467(5·0)        | 538(5·9)        |         |         |
| Han ethnicity (n, %)                         | 7781(84·9)      | 8290(90·5)      | 8514(92·9)      | 8706(95·0)      | <0·001  | <0·001  |
| Educational level (n, %)                     |                 |                 |                 |                 | <0·001  | <0·001  |
| Below junior high school                     | 6507(71·0)      | 5746(62·7)      | 4798(52·4)      | 3746(40·9)      |         |         |
| Junior high school                           | 2531(27·6)      | 3231(35·3)      | 3986(43·5)      | 4778(52·1)      |         |         |
| Senior high school or above                  | 124(1·4)        | 185(2·0)        | 378(4·1)        | 638(7·0)        |         |         |
| Having a partner (n, %)                      | 8524(93·0)      | 8641(94·3)      | 8715(95·1)      | 8739(95·4)      | <0·001  | <0·001  |
| Adequate physical activity (n, %)            | 8326(90·9)      | 8254(90·1)      | 8073(88·1)      | 8090(88·3)      | <0·001  | <0·001  |
| Smoking (n, %)                               | 2567(28·0)      | 2418(26·4)      | 2416(26·4)      | 2310(25·2)      | <0·001  | <0·001  |
| Drinking (n, %)                              | 3021(33·0)      | 3127(34·1)      | 3311(36·1)      | 3672(40·1)      | <0·001  | <0·001  |
| BMI(Median, P25th, P75th,kg/m <sup>2</sup> ) | 23·2(21·1;25·6) | 23·9(21·7;26·3) | 24·5(22·2;26·7) | 24·8(22·6;27·1) | <0·001  | <0·001  |
| BMI group (n, %)                             |                 |                 |                 |                 | <0·001  | <0·001  |
| Underweight                                  | 459(5·0)        | 333(3·6)        | 206(2·3)        | 166(1·8)        |         |         |
| Normal weight                                | 4928(53·8)      | 4337(47·3)      | 3860(42·1)      | 3561(38·9)      |         |         |
| Overweight                                   | 2899(31·6)      | 3249(35·5)      | 3687(40·2)      | 3753(41·0)      |         |         |
| Obesity                                      | 876(9·6)        | 1243(13·6)      | 1409(15·4)      | 1682(18·3)      |         |         |
| Family history of chronic diseases (n, %)    | 3029(33·1)      | 3934(42·9)      | 4586(50·1)      | 5154(56·3)      | <0·001  | <0·001  |
| Diabetes Mellitus (n, %)                     | 819(8·9)        | 922(10·1)       | 1096(12·0)      | 1146(12·5)      | <0·001  | <0·001  |
| FPG(Median, P25th, P75th,mmol/L)             | 5·2(4·8;5·7)    | 5·3(4·9;5·8)    | 5·3(4·9;5·8)    | 5·3(4·9;5·8)    | <0·001  | <0·001  |
| HbA1c (mean, std)                            | 5·1(0·9)        | 5·1(1·0)        | 5·2(1·0)        | 5·2(1·0)        | <0·001  | <0·001  |
| <b>Animal-based Pattern</b>                  |                 |                 |                 |                 |         |         |
| Female (n, %)                                | 5209(56·9)      | 5711(62·3)      | 5115(55·8)      | 3947(43·1)      | <0·001  | <0·001  |
| Age (Median,Q1, Q3,y)                        | 57·9(51·2;64·4) | 59·2(51·8;65·8) | 59·2(51·8;65·8) | 58·1(51·1;64·0) | <0·001  | 0·608   |
| Age group (n, %)                             |                 |                 |                 |                 | <0·001  | 0·911   |
| 45-59 y                                      | 5297(57·8)      | 4850(52·9)      | 4852(53·0)      | 5298(57·8)      |         |         |
| 60-74 y                                      | 3544(38·7)      | 3761(41·0)      | 3768(41·1)      | 3529(38·5)      |         |         |
| ≥75 y                                        | 321(3·5)        | 551(6·1)        | 542(5·9)        | 335(3·7)        |         |         |

|                                           |                 |                 |                 |                 |        |        |
|-------------------------------------------|-----------------|-----------------|-----------------|-----------------|--------|--------|
| <b>Rural (n, %)</b>                       | 6241(68·1)      | 5048(55·1)      | 5119(55·9)      | 5580(60·9)      | <0·001 | <0·001 |
| <b>Income (n, %)</b>                      |                 |                 |                 |                 | <0·001 | <0·001 |
| <b>&lt;5000 Yuan/month</b>                | 8039(87·7)      | 7166(78·2)      | 6848(74·7)      | 6928(75·6)      |        |        |
| <b>5000-9999 Yuan/month</b>               | 923(10·1)       | 1581(17·3)      | 1773(19·4)      | 1662(18·2)      |        |        |
| <b>≥10000 Yuan/month</b>                  | 200(2·2)        | 415(4·5)        | 541(5·9)        | 572(6·2)        |        |        |
| <b>Han ethnicity (n, %)</b>               | 8181(89·3)      | 8440(92·1)      | 8420(91·9)      | 8250(90·0)      | <0·001 | 0·13   |
| <b>Educational level (n, %)</b>           |                 |                 |                 |                 | <0·001 | <0·001 |
| <b>Below junior high school</b>           | 5476(59·8)      | 4945(54·0)      | 5215(56·9)      | 5161(56·3)      |        |        |
| <b>Junior high school</b>                 | 3499(38·2)      | 3834(41·8)      | 3540(38·6)      | 3653(39·9)      |        |        |
| <b>Senior high school or above</b>        | 187(2·0)        | 383(4·2)        | 407(4·5)        | 348(3·8)        |        |        |
| <b>Having a partner (n, %)</b>            | 8653(94·4)      | 8559(93·4)      | 8655(94·5)      | 8752(95·5)      | <0·001 | <0·001 |
| <b>Adequate physical activity (n, %)</b>  | 8039(87·7)      | 8040(87·8)      | 8239(89·9)      | 8425(92·0)      | <0·001 | <0·001 |
| <b>Smoking (n, %)</b>                     | 2224(24·3)      | 1994(21·8)      | 2359(25·7)      | 3134(34·2)      | <0·001 | <0·001 |
| <b>Drinking (n, %)</b>                    | 2681(29·3)      | 2992(32·7)      | 3392(37·0)      | 4066(44·4)      | <0·001 | <0·001 |
| <b>BMI(Median, P25th, P75th,kg/m²)</b>    | 24·4(22·1;26·9) | 24·5(22·2;26·9) | 23·9(21·7;26·3) | 23·6(21·5;25·9) | <0·001 | <0·001 |
| <b>BMI group (n, %)</b>                   |                 |                 |                 |                 | <0·001 | <0·001 |
| <b>Underweight</b>                        | 254(2·8)        | 258(2·8)        | 307(3·4)        | 345(3·8)        |        |        |
| <b>Normal weight</b>                      | 3872(42·3)      | 3823(41·7)      | 4352(47·5)      | 4639(50·6)      |        |        |
| <b>Overweight</b>                         | 3504(38·2)      | 3555(38·8)      | 3341(36·4)      | 3188(34·8)      |        |        |
| <b>Obesity</b>                            | 1532(16·7)      | 1526(16·7)      | 1162(12·7)      | 990(10·8)       |        |        |
| <b>Family history of chronic diseases</b> |                 |                 |                 |                 |        |        |
| <b>(n, %)</b>                             | 4384(47·8)      | 4486(49·0)      | 4186(45·7)      | 3647(39·8)      | <0·001 | <0·001 |
| <b>Diabetes Mellitus (n, %)</b>           | 904(9·9)        | 1183(12·9)      | 991(10·8)       | 905(9·9)        | <0·001 | 0·156  |
| <b>FPG(Median, P25th, P75th,mmol/L)</b>   | 5·2(4·8;5·7)    | 5·3(4·9;5·8)    | 5·3(4·9;5·8)    | 5·3(4·9;5·8)    | <0·001 | <0·001 |
| <b>HbA1c (mean, std)</b>                  | 5·1(0·9)        | 5·2(1·0)        | 5·14(1·0)       | 5·1(0·9)        | <0·001 | 0·706  |
| <b>Plant-based Pattern</b>                |                 |                 |                 |                 |        |        |
| <b>Female (n, %)</b>                      | 5350(58·4)      | 5312(58·0)      | 4884(53·3)      | 4436(48·4)      | <0·001 | <0·001 |
| <b>Age (Median,Q1, Q3,y)</b>              | 60·6(53·0;66·6) | 59·3(51·9;65·6) | 58·0(51·2;64·4) | 56·1(50·4;63·0) | <0·001 | <0·001 |
| <b>Age group (n, %)</b>                   |                 |                 |                 |                 | <0·001 | <0·001 |
| <b>45-59 y</b>                            | 4354(47·5)      | 4838(52·8)      | 5283(57·7)      | 5822(63·5)      |        |        |
| <b>60-74 y</b>                            | 4224(46·1)      | 3815(41·6)      | 3531(38·5)      | 3032(33·1)      |        |        |
| <b>≥75 y</b>                              | 584(6·4)        | 509(5·6)        | 348(3·8)        | 308(3·4)        |        |        |
| <b>Rural (n, %)</b>                       | 6485(70·8)      | 5570(60·8)      | 5167(56·4)      | 4766(52·0)      | <0·001 | <0·001 |
| <b>Income (n, %)</b>                      |                 |                 |                 |                 | <0·001 | <0·001 |
| <b>&lt;5000 Yuan/month</b>                | 7898(86·2)      | 7434(81·1)      | 7085(77·4)      | 6564(71·6)      |        |        |
| <b>5000-9999 Yuan/month</b>               | 989(10·8)       | 1345(14·7)      | 1635(17·8)      | 1970(21·5)      |        |        |
| <b>≥10000 Yuan/month</b>                  | 275(3·0)        | 383(4·2)        | 442(4·8)        | 628(6·9)        |        |        |
| <b>Han ethnicity (n, %)</b>               | 8327(90·9)      | 8433(92·0)      | 8428(92·0)      | 8103(88·4)      | <0·001 | <0·001 |
| <b>Educational level (n, %)</b>           |                 |                 |                 |                 | <0·001 | <0·001 |
| <b>Below junior high school</b>           | 6531(71·3)      | 5525(60·3)      | 4782(52·2)      | 3959(43·2)      |        |        |
| <b>Junior high school</b>                 | 2523(27·5)      | 3410(37·2)      | 4013(43·8)      | 4580(50·0)      |        |        |
| <b>Senior high school or above</b>        | 108(1·2)        | 227(2·5)        | 367(4·0)        | 623(6·8)        |        |        |
| <b>Having a partner (n, %)</b>            | 8549(93·3)      | 8612(94·0)      | 8703(95·0)      | 8755(95·6)      | <0·001 | <0·001 |

|                                                   |                 |                 |                 |                 |        |        |
|---------------------------------------------------|-----------------|-----------------|-----------------|-----------------|--------|--------|
| <b>Adequate physical activity (n, %)</b>          | 8362(91·3)      | 8122(88·6)      | 8149(88·9)      | 8110(88·5)      | <0·001 | <0·001 |
| <b>Smoking (n, %)</b>                             | 2241(24·5)      | 2276(24·8)      | 2510(27·4)      | 2684(29·3)      | <0·001 | <0·001 |
| <b>Drinking (n, %)</b>                            | 2525(27·6)      | 2934(32·0)      | 3501(38·2)      | 4171(45·5)      | <0·001 | <0·001 |
| <b>BMI(Median, P25th, P75th,kg/m<sup>2</sup>)</b> | 23·5(21·3;25·9) | 24·0(21·8;26·4) | 24·3(22·1;26·6) | 24·6(22·4;27·0) | <0·001 | <0·001 |
| <b>BMI group (n, %)</b>                           |                 |                 |                 |                 | <0·001 | <0·001 |
| <b>Underweight</b>                                | 403(4·4)        | 313(3·4)        | 247(2·7)        | 201(2·2)        |        |        |
| <b>Normal weight</b>                              | 4698(51·3)      | 4249(46·4)      | 3973(43·4)      | 3766(41·1)      |        |        |
| <b>Overweight</b>                                 | 3047(33·3)      | 3330(36·3)      | 3582(39·1)      | 3629(39·6)      |        |        |
| <b>Obesity</b>                                    | 1014(11·0)      | 1270(13·9)      | 1360(14·8)      | 1566(17·1)      |        |        |
| <b>Family history of chronic diseases</b>         |                 |                 |                 |                 |        |        |
| <b>(n, %)</b>                                     | 3324(36·3)      | 3928(42·9)      | 4488(49·0)      | 4963(54·2)      | <0·001 | <0·001 |
| <b>Diabetes Mellitus (n, %)</b>                   | 984(10·7)       | 1079(11·8)      | 948(10·3)       | 972(10·6)       | 0·011  | 0·21   |
| <b>FPG(Median, P25th, P75th,mmol/L)</b>           | 5·4(4·9;5·8)    | 5·3(4·9;5·8)    | 5·3(4·9;5·8)    | 5·2(4·9;5·7)    | <0·001 | <0·001 |
| <b>HbA1c (mean, std)</b>                          | 5·1(1·0)        | 5·2(1·0)        | 5·1(1·0)        | 5·1(1·0)        | 0·161  | 0·165  |

**Table S3 The food and nutrient intake of the highest-scoring group (Q4) in the three dietary patterns**

|                                          | Plant-based Pattern | Oriental traditional Pattern | Animal-based Pattern |
|------------------------------------------|---------------------|------------------------------|----------------------|
| Meat products and offal <sup>d</sup> (g) | 2·6                 | 3·3                          | 5·8                  |
| Dry legume <sup>d</sup> (g)              | 8·5                 | 3·1                          | 3·6                  |
| Poultry <sup>d</sup> (g)                 | 9·8                 | 15·2                         | 13·7                 |
| Beverages <sup>d</sup> (g)               | 11                  | 13·8                         | 28·7                 |
| Snacks <sup>bc</sup> (g)                 | 11·2                | 9·76                         | 22·2                 |
| Other red meats <sup>d</sup> (g)         | 11·7                | 6·5                          | 23                   |
| Nuts <sup>d</sup> (g)                    | 14·1                | 8·3                          | 24                   |
| Aquatic products <sup>d</sup> (g)        | 27·4                | 49·4                         | 31·4                 |
| Fungi and algae <sup>d</sup> (g)         | 27·9                | 16·5                         | 20·9                 |
| Legume products <sup>d</sup> (g)         | 28·5                | 15·7                         | 17·4                 |
| Liquors <sup>ac</sup> (g)                | 43·4                | 76·6                         | 76·8                 |
| Pork <sup>d</sup> (g)                    | 46·1                | 99·5                         | 58·4                 |
| Other cereals <sup>d</sup> (g)           | 50·2                | 7·53                         | 19·4                 |
| Eggs <sup>d</sup> (g)                    | 53·6                | 33                           | 44·4                 |
| Tubers <sup>d</sup> (g)                  | 80                  | 26·4                         | 65                   |
| Milk and dairy products <sup>d</sup> (g) | 93·2                | 40·5                         | 113                  |
| Rice and products <sup>d</sup> (g)       | 130                 | 378                          | 142                  |
| Fruits <sup>ab</sup> (g)                 | 166                 | 97                           | 166                  |
| Wheat and products <sup>d</sup> (g)      | 182                 | 38·9                         | 151                  |
| Vegetables <sup>d</sup> (g)              | 416                 | 446                          | 304                  |
| Vitamin b6 <sup>ab</sup> (mg)            | 0·04                | 0·03                         | 0·04                 |
| Vitamin b12 <sup>ac</sup> (ug)           | 0·04                | 0·09                         | 0·06                 |
| Riboflavin <sup>d</sup> (mg)             | 1·01                | 1·12                         | 1·04                 |
| Thiamin <sup>d</sup> (mg)                | 1·14                | 1·12                         | 1·14                 |
| Cu <sup>ab</sup> (mg)                    | 2·38                | 2·3                          | 2·46                 |
| I <sup>d</sup> (mg)                      | 6·03                | 6·27                         | 5·36                 |
| Mn <sup>bc</sup> (mg)                    | 6·84                | 7·35                         | 6·72                 |
| Zn <sup>d</sup> (mg)                     | 12·6                | 15·1                         | 13·4                 |
| Fiber <sup>d</sup> (g)                   | 15·9                | 13·5                         | 14·8                 |
| Niacin <sup>d</sup> (mg)                 | 17·4                | 23·5                         | 19·2                 |
| Fe(mg)                                   | 28·3                | 31·9                         | 27·9                 |
| Vitamin e <sup>ab</sup> (mg)             | 46·9                | 39·4                         | 49·2                 |
| Se <sup>bc</sup> (ug)                    | 59·7                | 64·8                         | 63                   |
| Protein <sup>d</sup> (g)                 | 81·3                | 91                           | 84·7                 |
| Fat <sup>d</sup> (g)                     | 91·2                | 114                          | 99·7                 |
| PUFA <sup>d</sup> (g)                    | 110                 | 122                          | 112                  |
| Vitamin c <sup>d</sup> (mg)              | 118                 | 128                          | 112                  |
| MUFA <sup>d</sup> (g)                    | 142                 | 190                          | 156                  |
| SFA <sup>d</sup> (g)                     | 182                 | 198                          | 195                  |
| Cholesterol <sup>d</sup> (mg)            | 192                 | 304                          | 231                  |
| Retinol <sup>c</sup> (ug)                | 200                 | 218                          | 236                  |

|                                |      |      |      |
|--------------------------------|------|------|------|
| Folate <sup>d</sup> (ug)       | 270  | 269  | 254  |
| Carbohydrate <sup>d</sup> (mg) | 335  | 321  | 332  |
| Mg <sup>d</sup> (mg)           | 383  | 404  | 367  |
| Ca <sup>d</sup> (mg)           | 516  | 552  | 501  |
| Vitamin a <sup>ab</sup> (ug)   | 580  | 741  | 611  |
| P(mg)                          | 1235 | 1306 | 1240 |
| K <sup>a</sup> (mg)            | 2255 | 2321 | 2240 |
| Carotene <sup>d</sup> (ug)     | 2280 | 3142 | 2249 |
| Na(mg)                         | 2381 | 4214 | 2338 |
| Energy <sup>d</sup> (Kcal)     | 2448 | 2676 | 2541 |

a: There are significant differences between the Plant-based Pattern and the Oriental traditional Pattern.

b: There are significant differences between the Oriental traditional Pattern and the Animal-based Pattern.

c: There are significant differences between the Plant-based Pattern and the Animal-based Pattern.

d: There are significant differences among the three dietary patterns.

**Table S4 The correlation between the three dietary patterns and food as well as nutrient intake**

|                         | Plant-based Pattern | Oriental traditional Pattern | Animal-based Pattern |
|-------------------------|---------------------|------------------------------|----------------------|
| Rice And Products       | -0.26               | 0.77                         | -0.30                |
| Wheat And Products      | 0.49                | -0.53                        | 0.33                 |
| Other Cereals           | 0.54                | -0.34                        | 0.13                 |
| Fungi And Algae         | 0.53                | 0.19                         | 0.34                 |
| Tubers                  | 0.42                | -0.25                        | 0.25                 |
| Dry Legume              | 0.39                | 0.05                         | 0.09                 |
| Legume Products         | 0.57                | 0.12                         | 0.18                 |
| Vegetables              | 0.35                | 0.44                         | -0.08                |
| Fruits                  | 0.47                | 0.06                         | 0.45                 |
| Nuts                    | 0.21                | 0.02                         | 0.43                 |
| Pork                    | 0.03                | 0.56                         | 0.12                 |
| Other Red Meats         | 0.24                | 0.05                         | 0.45                 |
| Meat Products And Offal | 0.04                | 0.19                         | 0.33                 |
| Poultry                 | 0.13                | 0.37                         | 0.30                 |
| Aquatic Products        | 0.18                | 0.54                         | 0.22                 |
| Eggs                    | 0.52                | 0.08                         | 0.32                 |
| Milk And Dairy Products | 0.28                | -0.03                        | 0.33                 |
| Liquors                 | 0.09                | 0.17                         | 0.18                 |
| Beverages               | -0.01               | 0.14                         | 0.26                 |
| Snacks                  | 0.12                | 0.13                         | 0.41                 |
| MUFA                    | -0.04               | 0.32                         | 0.04                 |
| PUFA                    | 0.04                | 0.12                         | 0.03                 |
| SFA                     | 0.06                | 0.17                         | 0.12                 |
| Ca                      | 0.15                | 0.21                         | 0.06                 |
| Carbohydrate            | 0.15                | -0.08                        | 0.07                 |
| Cholesterol             | -0.09               | 0.44                         | 0.08                 |
| Cu                      | 0.16                | 0.05                         | 0.13                 |
| Diet Fiber              | 0.26                | -0.07                        | 0.13                 |
| Energy                  | 0.07                | 0.14                         | 0.08                 |
| Fat                     | -0.04               | 0.27                         | 0.05                 |
| Fe                      | 0.13                | 0.11                         | 0.10                 |
| Folate                  | 0.17                | 0.16                         | 0.04                 |
| I                       | 0.00                | 0.12                         | 0.02                 |
| K                       | 0.19                | 0.13                         | 0.15                 |
| Mg                      | 0.22                | 0.01                         | 0.11                 |
| Mn                      | 0.07                | 0.07                         | 0.03                 |
| Na                      | 0.10                | 0.12                         | 0.11                 |
| Niacin                  | -0.06               | 0.40                         | 0.04                 |
| P                       | 0.17                | 0.13                         | 0.14                 |
| Protein                 | 0.12                | 0.21                         | 0.15                 |
| Retinol                 | 0.13                | 0.21                         | 0.18                 |

|             |       |       |       |
|-------------|-------|-------|-------|
| Riboflavin  | 0·13  | 0·25  | 0·14  |
| Se          | 0·17  | 0·10  | 0·22  |
| Thiamin     | 0·17  | 0·01  | 0·13  |
| Carotene    | -0·02 | 0·29  | -0·07 |
| Vitamin A   | 0·02  | 0·31  | 0·00  |
| Vitamin B6  | 0·10  | 0·03  | 0·10  |
| Vitamin B12 | 0·01  | 0·07  | 0·04  |
| Vitamin C   | 0·07  | 0·19  | -0·03 |
| Vitamin E   | 0·13  | -0·11 | 0·10  |
| Zn          | 0·03  | 0·28  | 0·07  |





|                                         |                 |      |    |                 |      |    |                 |      |
|-----------------------------------------|-----------------|------|----|-----------------|------|----|-----------------|------|
| Q1                                      | 1               | 0.96 | Q1 | 1               | 1.02 | Q1 | 1               | 0.97 |
| Q2                                      | 1.00(0.87,1.15) | 0.15 | Q2 | 1.23(1.07,1.42) | 0.50 | Q2 | 1.04(0.91,1.19) | 0.27 |
| Q3                                      | 1.16(1.01,1.34) |      | Q3 | 1.04(0.89,1.20) |      | Q3 | 0.90(0.78,1.04) |      |
| Q4                                      | 1.07(0.92,1.24) |      | Q4 | 1.15(0.99,1.33) |      | Q4 | 0.83(0.71,0.96) |      |
| Family history of chronic diseases(Yes) |                 |      |    |                 |      |    |                 |      |
| Q1                                      | 1               |      | Q1 | 1               |      | Q1 | 1               |      |
| Q2                                      | 0.97(0.83,1.12) |      | Q2 | 1.24(1.09,1.41) |      | Q2 | 0.94(0.82,1.08) |      |
| Q3                                      | 1.00(0.86,1.15) |      | Q3 | 1.18(1.03,1.34) |      | Q3 | 0.75(0.66,0.87) |      |
| Q4                                      | 0.97(0.84,1.12) |      | Q4 | 1.13(0.98,1.30) |      | Q4 | 0.79(0.69,0.91) |      |
| BMI(<18·5 kg/m²)                        |                 |      |    |                 |      |    |                 |      |
| Q1                                      | 1               | 0.98 | Q1 | 1               | 1.02 | Q1 | 1               | 1.02 |
| Q2                                      | 1.09(0.51,2.34) | 0.35 | Q2 | 2.04(0.74,5.65) | 0.43 | Q2 | 1.34(0.66,2.71) | 0.31 |
| Q3                                      | 1.18(0.50,2.79) |      | Q3 | 1.38(0.48,3.93) |      | Q3 | 0.61(0.24,1.53) |      |
| Q4                                      | 1.14(0.43,3.01) |      | Q4 | 2.13(0.81,5.59) |      | Q4 | 0.37(0.12,1.21) |      |
| BMI(18·5-23·9 kg/ m²)                   |                 |      |    |                 |      |    |                 |      |
| Q1                                      | 1               |      | Q1 | 1               |      | Q1 | 1               |      |
| Q2                                      | 1.08(0.92,1.28) |      | Q2 | 1.20(1.01,1.43) |      | Q2 | 1.12(0.96,1.31) |      |
| Q3                                      | 1.08(0.91,1.29) |      | Q3 | 1.02(0.86,1.22) |      | Q3 | 0.78(0.65,0.93) |      |
| Q4                                      | 1.13(0.94,1.35) |      | Q4 | 1.15(0.96,1.37) |      | Q4 | 0.82(0.68,0.98) |      |
| BMI(24·0- 27·9 kg/ m²)                  |                 |      |    |                 |      |    |                 |      |
| Q1                                      | 1               |      | Q1 | 1(1,1)          |      | Q1 | 1               |      |
| Q2                                      | 0.88(0.75,1.03) |      | Q2 | 1.26(1.09,1.45) |      | Q2 | 0.93(0.80,1.08) |      |
| Q3                                      | 1.01(0.86,1.17) |      | Q3 | 1.15(0.99,1.34) |      | Q3 | 0.83(0.72,0.96) |      |
| Q4                                      | 0.92(0.79,1.07) |      | Q4 | 1.10(0.94,1.28) |      | Q4 | 0.79(0.67,0.92) |      |
| BMI(≥ 28·0 kg/m²)                       |                 |      |    |                 |      |    |                 |      |
| Q1                                      | 1               |      | Q1 | 1               |      | Q1 | 1               |      |

|            |    |                 |      |    |                 |      |    |                 |      |
|------------|----|-----------------|------|----|-----------------|------|----|-----------------|------|
| Drink(No)  | Q2 | 1.04(0.83,1.31) |      | Q2 | 1.22(1.02,1.47) |      | Q2 | 0.92(0.75,1.13) |      |
|            | Q3 | 1.15(0.93,1.44) |      | Q3 | 1.15(0.94,1.41) |      | Q3 | 0.85(0.69,1.04) |      |
|            | Q4 | 1.08(0.87,1.34) |      | Q4 | 1.20(0.97,1.49) |      | Q4 | 0.86(0.70,1.06) |      |
|            | Q1 | 1               | 1.02 | Q1 | 1               | 1.03 | Q1 | 1               | 1.02 |
| Drink(Yes) | Q2 | 0.96(0.85,1.08) | 0.60 | Q2 | 1.24(1.11,1.39) | 0.44 | Q2 | 0.99(0.89,1.10) | 0.60 |
|            | Q3 | 1.03(0.91,1.16) |      | Q3 | 1.07(0.95,1.21) |      | Q3 | 0.80(0.71,0.90) |      |
|            | Q4 | 1.02(0.90,1.15) |      | Q4 | 1.11(0.98,1.26) |      | Q4 | 0.78(0.69,0.89) |      |
|            | Q1 | 1               |      | Q1 | 1               |      | Q1 | 1               |      |
| Smoke(No)  | Q2 | 1.09(0.90,1.32) |      | Q2 | 1.21(1.01,1.45) |      | Q2 | 1.02(0.84,1.23) |      |
|            | Q3 | 1.22(1.01,1.46) |      | Q3 | 1.17(0.98,1.41) |      | Q3 | 0.89(0.74,1.08) |      |
|            | Q4 | 1.07(0.89,1.29) |      | Q4 | 1.20(1.00,1.43) |      | Q4 | 0.90(0.75,1.08) |      |
|            | Q1 | 1               | 1.04 | Q1 | 1               | 1.00 | Q1 | 1               | 1.08 |
| Smoke(Yes) | Q2 | 0.98(0.88,1.10) | 0.27 | Q2 | 1.27(1.15,1.42) | 0.98 | Q2 | 1.00(0.90,1.11) | 0.04 |
|            | Q3 | 1.10(0.98,1.23) |      | Q3 | 1.15(1.03,1.28) |      | Q3 | 0.8(0.71,0.89)  |      |
|            | Q4 | 1.02(0.91,1.14) |      | Q4 | 1.13(1.01,1.28) |      | Q4 | 0.81(0.72,0.9)  |      |
|            | Q1 | 1               |      | Q1 | 1               |      | Q1 | 1               |      |
|            | Q2 | 1.01(0.81,1.25) |      | Q2 | 1.08(0.87,1.34) |      | Q2 | 0.99(0.80,1.23) |      |
|            | Q3 | 1.03(0.83,1.26) |      | Q3 | 0.99(0.80,1.22) |      | Q3 | 0.92(0.75,1.14) |      |
|            | Q4 | 1.07(0.86,1.32) |      | Q4 | 1.15(0.94,1.41) |      | Q4 | 0.87(0.70,1.07) |      |
